# Supplementary material
Source: PubMed Central journal article supplement (PMC3472506)
Supplement: pr200698c_si_002.pdf [file pr200698c_si_002.pdf]

### Cluster dendrogram with AU/BP values (%)

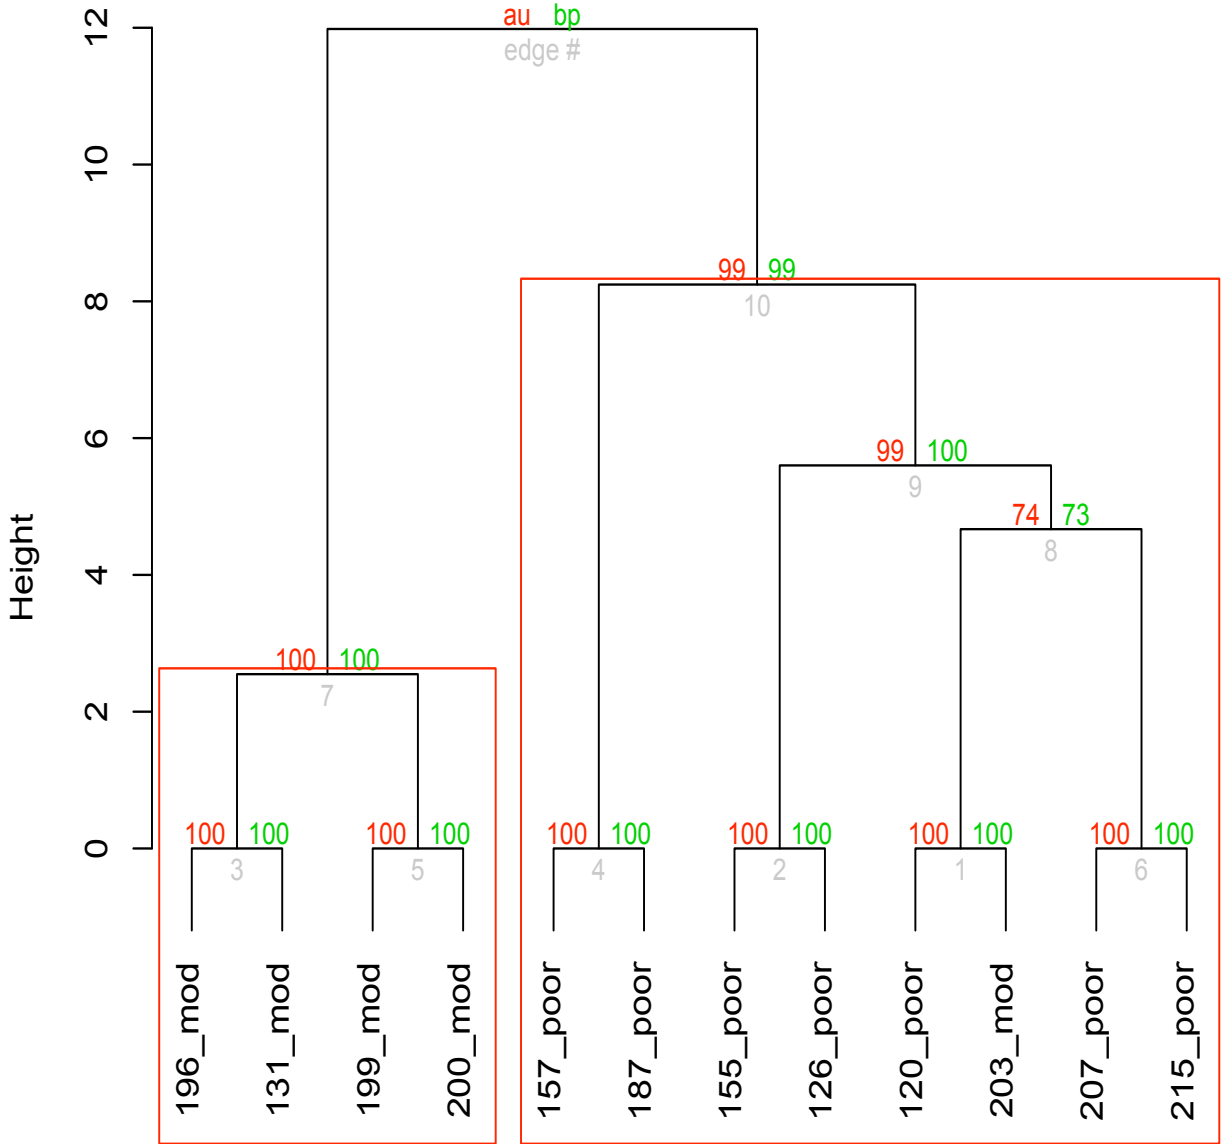

Distance: euclidean  
Cluster method: ward

Supplementary Figure 2
